# mRNA-based COVID-19 booster vaccination is highly effective and cost-effective in Australia

Rui Li<sup>1</sup>, Hanting Liu<sup>1</sup>, Christopher K Fairley<sup>1,2,3</sup>, Jason J Ong<sup>1,2,3</sup>, Yuming Guo<sup>1,2,3</sup>, Zhuoru Zou<sup>1</sup>, Li Xie<sup>1</sup>, Guihua Zhuang<sup>1,5</sup>, Yan Li<sup>6,7\*</sup>, Mingwang Shen<sup>1,5\*</sup>, Lei Zhang<sup>1,2,3,4\*</sup>

1. China-Australia Joint Research Center for Infectious Diseases, School of Public Health, Xi'an Jiaotong University Health Science Center, Xi'an, Shaanxi, 710061, China
2. Melbourne Sexual Health Centre, Alfred Health, Melbourne, Australia
3. Central Clinical School, Faculty of Medicine, Nursing and Health Sciences, Monash University, Melbourne, VIC, Australia
4. Department of Epidemiology and Biostatistics, College of Public Health, Zhengzhou University, Zhengzhou 450001, Henan, China.
5. Key Laboratory for Disease Prevention and Control and Health Promotion of Shaanxi Province, Xi'an, Shaanxi, 710061, China
6. Department of Population Health Science and Policy, Icahn School of Medicine at Mount Sinai, New York, NY, USA
7. Department of Obstetrics, Gynaecology, and Reproductive Science, Icahn School of Medicine at Mount Sinai, New York, NY, USA

## \*Corresponding authors:

- Lei Zhang, PhD, China-Australia Joint Research Center for Infectious Diseases, School of Public Health, Xi'an Jiaotong University Health Science Center, Xi'an, Shaanxi, China. Email: [lei.zhang1@monash.edu](mailto:lei.zhang1@monash.edu)
- Mingwang Shen, PhD, China-Australia Joint Research Center for Infectious Diseases, School of Public Health, Xi'an Jiaotong University Health Science Center, Xi'an, Shaanxi, China. Email: [mingwangshen521@xjtu.edu.cn](mailto:mingwangshen521@xjtu.edu.cn)
- Yan Li, PhD, Department of Population Health Science and Policy, Icahn School of Medicine at Mount Sinai, New York, NY, USA. Email: [yan.li1@mountsinai.org](mailto:yan.li1@mountsinai.org)

**Word Count.** Main text: 2863 words; Abstract: 234 words.

## Abstract

**Background:** Australia implemented an mRNA-based booster vaccination strategy against the COVID-19 Omicron variant in November 2021. We aimed to evaluate the effectiveness and cost-effectiveness of the booster strategy over 180 days.

**Methods:** We developed a decision-analytic Markov model of COVID-19 to evaluate the cost-effectiveness of a booster strategy (administered 3 months after 2<sup>nd</sup> dose) in those aged  $\geq 16$  years in Australia from a healthcare system perspective. The willingness-to-pay threshold was chosen as A\$ 50,000.

**Findings:** Compared with 2-doses of COVID-19 vaccines without a booster, Australia's booster strategy would incur an additional cost of A\$0.88 billion but save A\$1.28 billion in direct medical cost and gain 670 quality-adjusted life years (QALYs) in 180 days of its implementation. This suggested the booster strategy is cost-saving, corresponding to a benefit-cost ratio of 1.45 and a net monetary benefit of A\$0.43 billion. The strategy would prevent 1.32 million new infections, 65,170 hospitalisations, 6,927 ICU admissions and 1,348 deaths from COVID-19 in 180 days. Further, a universal booster strategy of having all individuals vaccinated with the booster shot immediately once their eligibility is met would have resulted in a gain of 1,599 QALYs, a net monetary benefit of A\$1.46 billion and a benefit-cost ratio of 1.95 in 180 days.

**Interpretation:** The COVID-19 booster strategy implemented in Australia is likely to be effective and cost-effective for the Omicron epidemic. Universal booster vaccination would have further improved its effectiveness and cost-effectiveness.

**Funding:** National Natural Science Foundation of China. Bill and Melinda Gates Foundation

## Introduction

As of 5<sup>th</sup> May 2022, the COVID-19 pandemic has caused more than 516 million cases and claimed more than 6 million lives worldwide<sup>1</sup>. Prevention and control of the disease have substantially interrupted economic activities and caused an enormous economic burden in both developing and developed countries<sup>2-4</sup>. Australia implemented a strict 'COVID-zero' policy and reported 200,000 cumulative infections and less than 2000 deaths (case-fatality rate ~1%) over the past two years before the recent emergence of the Omicron variant<sup>5</sup>. However, the Omicron outbreak alone has caused more than 6 million new COVID-19 cases in six months since November 2021, despite more than 90% full (2-doses) vaccination coverage in Australia<sup>6</sup>. Given the lower viral pathogenicity of Omicron and high vaccination protection against disease progression, about 5000 deaths (case-fatality rate ~0.08%) were reported for Omicron, demonstrating a much lower mortality rate compared with the previous variants.

A COVID-19 booster reportedly improves vaccine protection in fully vaccinated individuals against the Delta variant<sup>7-10</sup>. Since the emergence of the Omicron variant, it has become apparent that the waning of vaccine protection of two doses of COVID-19 vaccine accelerated, likely due to Omicron's ability to evade both natural and vaccine-induced immunity<sup>11,12</sup>. Australian Technical Advisory Group on Immunisation (ATAGI) approved the use of a booster first for individuals at greater risk of severe COVID-19 (e.g. immunocompromised individuals) at the end of October 2021 and gradually expanded to cover all individuals aged ≥16 years during the Omicron epidemic. ATAGI mainly recommends mRNA vaccines (Pfizer/BNT162b2, Moderna/mRNA1273) as a single booster dose over AstraZeneca for all eligible Australian residents, including those who have received the AstraZeneca COVID-19 vaccine for their primary course<sup>13</sup>. Among individuals who are fully vaccinated in Australia, about 35% were fully vaccinated with AstraZeneca and 65% with mRNA vaccines. For booster shots, mRNA vaccines have become the dominant booster option (>99%)<sup>6</sup>, although other vaccines also exist.

Accumulating evidence suggests that the disease severity associated with the Omicron variant is far lower than that of the Delta variant<sup>14,15</sup>, potentially contributing to much lower disease and economic burden. Most infections are asymptomatic or with very mild symptoms and often spontaneously recover within seven days, especially among fully vaccinated individuals<sup>16,17</sup>. An increasing number of experts argue for treating Omicron as a mild infectious disease like seasonal influenza in both surveillance and treatment<sup>18,19</sup>. Namely, non-pharmaceutical interventions (NPIs) for COVID-19 in Australia, similar to many other countries worldwide, would be minimal. As a result, vaccination becomes the major means to reduce COVID-19 transmission at a population level<sup>5</sup>. Therefore, evaluating the potential population impact and cost-effectiveness of the widely administered booster shots in Australia would shed important light on Australia's COVID-19 prevention and control strategy. Our study aimed to evaluate the population impact and cost-effectiveness of Australia's COVID-19 booster strategy during the Omicron epidemic using a decision-analytic Markov model.

## Methods

### Study design

Based on a decision-analytic Markov model, we conducted an economic evaluation on the cost-effectiveness of COVID-19 booster vaccination (predominately mRNA vaccines, 3 months after 2<sup>nd</sup> dose) in those aged ≥16 years in Australia. The evaluation was conducted from a healthcare system perspective. The model was constructed using TreeAge Pro 2021 R1.1, and the analysis was conducted according to the Consolidated Health Economic Evaluation Reporting Standards 2022 (CHEERS 2022) statement<sup>20</sup>.

### Modelling

A decision-analytic Markov model was constructed to simulate the disease progression of SARS-CoV-2 infection for those aged ≥16 years over a period of 180 days. As the Omicron variant of SARS-CoV-2 has become dominant in Australia, our study mainly focused on modelling the transmission of the Omicron variant. Existing evidence indicated that the vaccine efficacy (VE) of Pfizer-BioNTech BNT162b2, Moderna mRNA1273 and AstraZeneca AZD1222 against Omicron would gradually wane after three months<sup>21-23</sup>. Thus, we defined the vaccine efficacy from 2 weeks to 3 months after the 2<sup>nd</sup> dose as a 'short-term VE', whereas the

vaccine efficacy 3 months beyond the 2<sup>nd</sup> dose as a 'long-term VE'. Likewise, the vaccine efficacy after a booster could also be divided into a 'short-term booster VE' and a 'long-term booster VE' by the threshold of 3 months.

The model consisted of 11 health states capturing the disease progression of COVID-19 (Figure S1). A vaccinated individual may be infected by SARS-CoV-2 and enter a 'latent infection state'. After a mean incubation period of 5.2 (4.1-7.0) days<sup>24</sup>, about 83% of infected individuals developed symptoms<sup>25</sup>, and the remaining asymptomatic infections would spontaneously recover. A symptomatic infection might first exhibit 'mild/moderate' symptoms. They might then 'recover' or deteriorate to a 'severe' state. A patient in the 'severe' state might 'recover' or progress to the 'critical' state. Similarly, a patient in the 'critical' state might 'recover' or 'die'. Transition probabilities between states were estimated using the formula  $p = 1 - e^{-r}$ , where  $r$  denoted daily transition rate<sup>25</sup>. The basic model cycle length was 1 day, with a half-cycle correction applied.

## Definition of scenarios

We explored three scenarios: Scenario 1: this counterfactual scenario assumed there was no booster vaccination implemented in Australia after the 2<sup>nd</sup> dose; Scenario 2: current scenario represented the actual situation of booster vaccination in Australia, achieving coverage of 69.4% by 5<sup>th</sup> May 2022; and Scenario 3: an ideal scenario of universal booster vaccination where all eligible individuals received a booster immediately once their booster vaccination requirement is met.

## Data collection

We collected data on the vaccine efficacy (VE) for Omicron variant infection based on an ongoing systematic review conducted by The International Vaccine Access Center<sup>26</sup>. We included 11 eligible studies to estimate the pooled short-term and long-term VE of the 2-dose vaccination and booster shot (Appendix 1.2). Based on the varied VE for preventing COVID-19 infection and severe progression, we developed a mathematical model to estimate the distributions of clinical disease stages after being infected by SARS-CoV-2 in vaccinated individuals compared to that in unvaccinated ones (Appendix 1.3). In addition, we collected Australia's daily reported population incidence from 'Our World in Data', a website hosted and updated daily for COVID-19 cases worldwide<sup>27</sup>. Integrating with the COVID-19 vaccination information in Australia<sup>6</sup>, we calculated varied population incidence in varied vaccination statuses during the Omicron epidemic (Appendix 1.4).

The costs of booster vaccination included the costs of the mRNA-based vaccine in Australia (A\$53/dose) and the vaccination administration (\$20/dose)<sup>28,29</sup>. The cost of PCR tests and rapid antigen self-test for COVID-19 infection was estimated to be A\$85 and A\$13 per person, respectively<sup>30,31</sup>. In addition, we collected the costs of general practitioner (GP) consultation, general hospitalisation and ICU admission from published literature<sup>32-34</sup>. The cost of medical services varied across clinical disease stages<sup>25,35-37</sup>, and we calculated the total direct medical cost of COVID-19 cases with varied severity by multiplying the unit cost of the medical services by the duration of each disease stage (Appendix 1.5). Health utility scores for COVID-19 patients were derived from the disutility weights of severe lower respiratory tract infection<sup>38,39</sup> and the estimates of pricing models for COVID-19 treatments published by the Institute for Clinical and Economic Review<sup>40</sup> (Appendix 1.6).

We assumed a discount rate of 3% (0-6%) annually for both cost and quality-adjusted life-years (QALYs). We calculated the incremental costs and incremental QALYs for booster vaccination strategy compared with no booster (counterfactual scenario). The incremental cost-effectiveness ratio (ICER) was defined as the incremental cost per QALY gained. We used a willingness-to-pay (WTP) threshold of ICER < A\$50,000. We conducted additional economic evaluations by calculating the benefit-cost ratio, net monetary benefit and cost/death saved.

## Sensitivity analysis

We conducted a univariate sensitivity analysis to examine the impact of model parameters within their respective ranges on the ICER to identify the most sensitive parameters and visualised the results using tornado diagrams (Figure 2). In addition, we conducted a probabilistic sensitivity analysis (PSA) based on 100,000 simulations to determine the probability of the booster strategy being cost-effective across a range of cost-effectiveness

thresholds. The distributions of all model parameters are provided in Appendix 1.7. We also varied the evaluation period from 90 to 180 days and reported the corresponding ICER and benefit-cost ratio (Figure 3).

## Results

### Population impact and cost-effectiveness of COVID-19 booster strategies in Australia

#### *Counterfactual scenario with no booster strategy*

Figure 1 compared various vaccination scenarios in Australia. In the counterfactual scenario where there was no booster vaccination in Australia, the Omicron epidemic would result in 6.37 million individuals being infected, 259,200 hospitalisations, 27,917 ICU admissions, and 5,656 deaths over an evaluation period of 180 days. This will amount to a direct medical cost of A\$5.31 billion.

#### *Current booster strategy*

In comparison with the counterfactual scenario, the current booster strategy in Australia would lead to 1.32 million fewer infected cases, 65,170 fewer hospitalisations, 6,927 fewer ICU admissions and 1,348 fewer deaths in 180 days. At the same time, it would reduce the direct medical cost by A\$1.28 billion but only incur an additional vaccination cost of A\$0.88 billion, corresponding to a benefit-cost ratio of 1.45. We found that \$655,077 was required to prevent one COVID-19 death. Moreover, the strategy would gain 670 QALYs during the 180 days with a net monetary benefit of A\$0.43 billion. This suggested the current booster strategy is cost-saving.

#### *Universal booster strategy*

Compared with the current scenario, a universal booster strategy, where all eligible individuals receive a booster immediately when their booster vaccination requirement is met, would further improve the benefits. In addition to the gains in the current booster strategy, this scenario would further reduce 1.42 million infected cases, 73,753 hospitalisations, 8,081 ICU admissions and 1,706 deaths, which amount to A\$1.56 billion less in direct medical costs. Likewise, the universal booster strategy would gain 1,599 QALYs and a net monetary benefit of A\$1.46 billion during the 180 days with a benefit-cost ratio of 1.95. This scenario would incur an additional vaccination cost of A\$1.45 billion and cost A\$476,123 to prevent one COVID-19 death.

### Impact of individual model parameters on booster cost-effectiveness

The PSA, based on 100,000 simulations, demonstrated the probability of being cost-effective (including being cost-saving) with the current booster strategy was 71.2%, indicating a high chance of being cost-effective compared with no booster vaccination (Figure 2A). In contrast, the tornado diagram demonstrated that varying any individual model parameter except long-term VE for severe infection at one time would not change the conclusion of cost-effectiveness of the booster strategy (Figure 2B). We also noted that both the increase in vaccination cost and decrease in direct medical cost for COVID-19 treatment would reduce the cost-effectiveness of the booster strategy but were not sufficient to alter our conclusion.

### Impact of varied evaluation periods on booster cost-effectiveness

Figure 3 investigated the impact of varying evaluation periods (from 90 to 180 days) on the cost-effectiveness of the booster strategy compared to no booster. We found that for the current booster strategy to be cost-effective (ICER < A\$50,000), the evaluation period in this cost-effectiveness analysis needed to be >140 days (Figure 3A). This indicated that the booster strategy would be more cost-effective and beneficial in the long term than in the short term. Our results showed that the benefit-cost ratio of a booster strategy was 0.55 in a 90-day evaluation period, which meant that every dollar of investment spent on the booster would only save 0.55 dollars for treating fewer hospitalised COVID-19 patients. However, this ratio would increase from 0.55 to 1.45 when the evaluation period was extended to 180 days (Figure 3B).

## Discussion:

Our study evaluated the cost-effectiveness of the mRNA-based booster vaccination strategy among individuals aged ≥16 years in Australia. We identified several key findings. First, the current booster vaccination strategy is



highly cost-saving. Compared to the no booster scenario, the current booster strategy would prevent 1.32 million new infections, 65,170 hospitalisations, 6,927 ICU admissions and 1,348 deaths in 180 days. It demonstrates a cost-benefit ratio of 1.45 and a net monetary benefit of A\$0.43 billion. Further, a universal vaccination strategy of having all individuals vaccinated with the booster shot immediately once their eligibility is met would be even more cost-effective compared with the current scenario, further preventing 1.42 million additional new cases, 73,753 hospitalisations, 8,081 ICU admissions and 1,706 deaths. It demonstrates a cost-benefit ratio of 1.95 and a net monetary benefit of A\$1.46 billion.

Our findings of cost-effectiveness are comparable with the findings from similar studies in other settings<sup>41,42</sup>. A recent cost-effectiveness analysis demonstrates that a BNT162n booster strategy is cost-saving among individuals aged  $\geq 65$  years in the United States (US)<sup>42</sup>, with a benefit-cost ratio of 1.95. Compared to this 1.95 ratio, our study identifies a lower benefit-cost ratio of 1.45 in Australia, which is mostly attributed to the fact that vaccine price is twice the cost in the US<sup>28,43</sup>. A higher vaccine price due to export and transport would reduce the cost-effectiveness of a booster strategy but not enough to alter the conclusion. Further, the significant development of antiviral drugs for COVID-19 treatment holds promise to change the pandemic's course<sup>44</sup>. Pfizer's oral antiviral drug Paxlovid is highly effective and reduces by 89% the number of hospital admissions and deaths among people with COVID-19 who are at high risk of severe illness<sup>45</sup>. Similarly, molnupiravir and fluvoxamine have also shown high efficacy in preventing severe illness<sup>46</sup>. However, supply shortages and huge global inequities in access to new treatments for COVID-19, especially in low- and middle-income countries<sup>47,48</sup>, may be major obstacles to the scale-up of these antiviral treatments worldwide in the short term. In Australia, the first oral treatments for COVID-19, such as molnupiravir and Paxlovid were provisionally approved by the Therapeutic Goods Administration (TGA) on 18<sup>th</sup> January 2022. If low-price antiviral drugs can be made available and accessible to the general population like vaccines in the future, the cost-effectiveness of the booster strategy will likely reduce substantially.

Our study demonstrates a universal booster strategy would have further improved the strategy's cost-effectiveness. This finding strongly suggests that rapid scale-up of vaccination would be the most beneficial strategy in combating the Omicron epidemic in Australia. The main reason for the excellent cost-effectiveness of the universal vaccination strategy is that the vaccine effectiveness (VE) of 2-doses against the Omicron variant is low, and it declines sharply over time<sup>21-23</sup>. Based on our meta-analysis (Appendix 1.2), the short-term VE against Omicron infections of 2 doses is 36% and would reduce to only 4% after a period of 90 days. In contrast, the short-term VE against Omicron infections of a booster shot is 62% and would reduce to 46% after 90 days. Hence, for the Omicron epidemic with an increased incidence of reinfections and breakthrough infections<sup>49</sup>, receiving a booster as early as possible may be the most cost-effective way to reduce the COVID-19 disease burden.

Our study suggests the vaccination booster strategy is practical for COVID-19 prevention and control in Australia. To date, Australia has fully opened its borders, removing most social-distancing restrictions (such as city lockdown) and the requirement of facial masks in most public areas, including indoors. Contact tracing and the quarantine requirements for close contacts have also been lifted in Australia. Living with the virus has become a socially accepted norm in the post-COVID era. Accumulating evidence indicates that the epidemic will become endemic. Our study suggests that the epidemic needs to be persisting for at least 140 days for the booster strategy to be cost-effective. This implies the booster strategy will not be compatible with the previous 'COVID-zero' strategy, which often reduced the epidemic to a low level within weeks through harsh NPIs but is more aligned with an endemic COVID-19 control in Australia. Also, considering the rapid emergence of new SARS-COV-2 mutants<sup>50,51</sup>, enhancing the vaccine protection in the population remains the most practical way to avoid a sudden surge of the disease burden of COVID-19 and potential overload of the healthcare system in Australia. Further, learning from the experiences of seasonal influenza control<sup>52</sup> and regular improvement of COVID-19 vaccines may also be a necessary strategy in the long term.

Our study has several limitations. First, in the absence of empirical evidence of randomised controlled trials, we estimated the efficacy of the mRNA-based booster against the Omicron variant based on a synthesis of evidence from real-world data. We conducted various sensitivity analyses to account for the uncertainty in parameter

estimation based on real-world data. Second, we assumed that the efficacy of COVID-19 vaccines begins to wane in 3 months. In reality, the efficacy of vaccines is more likely to gradually decline without a clear cut-off. This assumption may have led to an overestimate of vaccine efficacy in the short term, and an underestimate in the long term. Third, we did not consider the other non-mRNA-based COVID-19 vaccines (e.g., AstraZeneca or Novavax) in Australia. However, AstraZeneca is no longer recommended for use as the booster dose for people who received a primary vaccination course of the AstraZeneca COVID-19 vaccine, and Novavax is rarely used (<1%) in Australia. Finally, given limited public health resources and escalating health inequity during the pandemic, there is a need for more targeted, local-based vaccine and booster distribution strategies that can achieve a tradeoff between cost-effectiveness and equity. The design of such strategies, while beyond the scope of this work, will be critical in alleviating the burden of COVID-19, reducing health care costs, and achieving equity.

In conclusion, Australia's current COVID-19 booster strategy is likely to be effective and cost-effective for curbing this Omicron epidemic. Further, achieving a universal booster vaccination would have improved its effectiveness and cost-effectiveness.

## Declarations

### Ethics approval and consent to participate

Not applicable

### Competing interests

The authors declare that they have no competing interests.

### Funding

The work is supported by the Bill & Melinda Gates Foundation. LZ is supported by the National Natural Science Foundation of China (Grant number: 81950410639); Outstanding Young Scholars Funding (Grant number: 3111500001); Xi'an Jiaotong University Basic Research and Profession Grant (Grant number: xtr022019003 and xzy032020032) and Xi'an Jiaotong University Young Talent Support Grant (Grant number: YX6J004). MS was supported by the National Natural Science Foundation of China (Grant number: 12171387, 11801435), China Postdoctoral Science Foundation (Grant number: 2018M631134, 2020T130095ZX); Young Talent Support Program of Shaanxi University Association for Science and Technology (Grant number: 20210307).

### Authors' contributions

LZ conceived the study. LZ, YL, MS and RL designed and constructed the model. RL performed the modelled analyses, graphed and interpreted the results. RL, HL, ZZ, and LX contributed to the collection of data and model parameters. RL drafted the manuscript. LZ, MS, YL, CKF, JJO and YG critically revised the manuscript. All authors reviewed the manuscript and approved the final version.



## Reference:

1. JHU. Coronavirus Resource Center: COVID-19 Tracking. 2022. <https://coronavirus.jhu.edu> (accessed April 10, 2022).
2. Jin H, Wang H, Li X, et al. Economic burden of COVID-19, China, January-March, 2020: a cost-of-illness study. *Bull World Health Organ* 2021; **99**(2): 112-24.
3. Ramgobin D, Benson J, Kalayanamitra R, et al. The Economic Implications of COVID-19 in the United States. *S D Med* 2020; **73**(5): 218-22.
4. McKibbin W, & Fernando, R. The economic impact of COVID-19. *Econ Time* COVID-19. 2020;45(10.1162).
5. Australia. About the COVID-19 pandemic. 2021. <https://www.health.gov.au/health-alerts/covid-19/about> (accessed 05th April, 2022).
6. Australia. COVID-19 vaccination daily rollout update. 2022. <https://www.health.gov.au/resources/collections/covid-19-vaccination-daily-rollout-update> (accessed 05th April, 2022).
7. Andrews N, Tessier E, Stowe J, et al. Vaccine effectiveness and duration of protection of Comirnaty, Vaxzevria and Spikevax against mild and severe COVID-19 in the UK. *medRxiv* 2021: 2021.09.15.21263583.
8. Chemaitelly H, Tang P, Hasan MR, et al. Waning of BNT162b2 Vaccine Protection against SARS-CoV-2 Infection in Qatar. *N Engl J Med* 2021.
9. Goldberg Y, Mandel M, Bar-On YM, et al. Waning Immunity after the BNT162b2 Vaccine in Israel. *N Engl J Med* 2021.
10. Tartof SY, Slezak JM, Fischer H, et al. effectiveness of mRNA BNT162b2 COVID-19 vaccine up to 6 months in a large integrated health system in the USA: a retrospective cohort study. *Lancet* 2021; **398**(10309): 1407-16.
11. Andrews N, Stowe J, Kirsebom F, et al. Effectiveness of COVID-19 vaccines against the Omicron (B.1.1.529) variant of concern. *medRxiv* 2021: 2021.12.14.21267615.
12. Dejnirattisai W, Huo J, Zhou D, et al. SARS-CoV-2 Omicron-B.1.1.529 leads to widespread escape from neutralising antibody responses. *Cell* 2022; **185**(3): 467-84.e15.
13. Australia. ATAGI recommendations on the use of a booster dose of COVID-19 vaccine. 2022. <https://www.health.gov.au/resources/publications/atagi-recommendations-on-the-use-of-a-booster-dose-of-covid-19-vaccine> (accessed 05th April, 2022).
14. Wang L, Berger NA, Kaelber DC, Davis PB, Volkow ND, Xu R. COVID infection rates, clinical outcomes, and racial/ethnic and gender disparities before and after Omicron emerged in the US. *medRxiv* 2022.
15. Madhi SA, Kwatra G, Myers JE, et al. Population Immunity and Covid-19 Severity with Omicron Variant in South Africa. *N Engl J Med* 2022.
16. Ledford H. How severe are Omicron infections? *Nature* 2021; **600**(7890): 577-8.
17. Madhi SA, Ihekweazu C, Rees H, Pollard AJ. Decoupling of omicron variant infections and severe COVID-19. *Lancet* 2022; **399**(10329): 1047-8.
18. Adam D. Will Omicron end the pandemic? Here's what experts say. *Nature* 2022; **602**(7895): 20-1.
19. Mattiuzzi C, Henry BM, Lippi G. COVID-19 vaccination and SARS-CoV-2 Omicron (B.1.1.529) variant: a light at the end of the tunnel? *Int J Infect Dis* 2022; **118**: 167-8.
20. Husereau D, Drummond M, Augustovski F, et al. Consolidated Health Economic Evaluation Reporting Standards 2022 (CHEERS 2022) Statement: Updated Reporting Guidance for Health Economic Evaluations. *Value Health* 2022; **25**(1): 3-9.
21. Ferdinands JM, Rao S, Dixon BE, et al. Waning 2-Dose and 3-Dose Effectiveness of mRNA Vaccines Against COVID-19-Associated Emergency Department and Urgent Care Encounters and Hospitalisations Among Adults During Periods of Delta and Omicron Variant Predominance - VISION Network, 10 States, August 2021-January 2022. *MMWR Morb Mortal Wkly Rep* 2022; **71**(7): 255-63.
22. Brian J. Willett JG, Oscar A. MacLean, Craig Wilkie, Nicola Logan, Giuditta De Lorenzo, Wilhelm Furnon, Sam Scott, Maria Manali, Agnieszka Szemiel, Shirin Ashraf, Elen Vink, William T. Harvey, Chris Davis, Richard Orton, et al. The hyper-transmissible SARS-CoV-2 Omicron variant exhibits significant antigenic change, vaccine escape and a switch in cell entry mechanism. 2022.

23. Hiam Chemaitelly HHA, Sawsan AlMukdad, Patrick Tang, Mohammad R. Hasan, Hadi M. Yassine, Hebah A. Al Khatib, Maria K. Smatti, Peter Coyle, Zaina Al Kanaani, Einas Al Kuwari, Andrew Jeremijenko, Anvar Hassan Kaleeckal, Ali Nizar Latif, Riyazuddin Mohammad Shaik, Hanan F. Abdul Rahim, Gheyath K. Nasrallah, Mohamed Ghaith Al Kuwari, Adeel A. Butt, Hamad Eid Al Romaihi, Mohamed H. Al-Thani, Abdullatif Al Khal, Roberto Bertollini, Laith J. Abu-Raddad. Duration of protection of BNT162b2 and mRNA-1273 COVID-19 vaccines against symptomatic SARS-CoV-2 Omicron infection in Qatar. 2022.
24. Li Q, Guan X, Wu P, et al. Early Transmission Dynamics in Wuhan, China, of Novel Coronavirus-Infected Pneumonia. *N Engl J Med* 2020; **382**(13): 1199-207.
25. Reddy KP, Shebl FM, Foote JHA, et al. Cost-effectiveness of public health strategies for COVID-19 epidemic control in South Africa: a microsimulation modelling study. *Lancet Glob Health* 2021; **9**(2): e120-e9.
26. IVAC. Results of COVID-19 Vaccine Effectiveness Studies: An Ongoing Systematic Review. 2022. <https://view-hub.org/resources> (accessed 05th March, 2022).
27. OWID. COVID vaccination data. 2022. <https://ourworldindata.org/covid-vaccinations> (accessed 05th April, 2022).
28. Dean L. How much the Covid-19 vaccine will cost Australians. 2020. <https://au.finance.yahoo.com/news/how-much-the-covid-19-vaccine-will-cost-australians-011135657.html> (accessed 05th April, 2022).
29. Rasdien P. Pharmacies and GPs are charging people for their free influenza vaccination. 2019. <https://thewest.com.au/news/health/pharmacies-and-gps-are-charging-people-for-their-free-influenza-vaccination-ng-b881206397z> (accessed 05th April, 2022).
30. MBS. Extension of SARS-CoV-2 (COVID-19) Laboratory Testing Items. 2022. <http://www.mbsonline.gov.au/internet/mbsonline/publishing.nsf/Content/Factsheet-Cov.LTI> (accessed 27th February, 2022).
31. Test RS. Covid-19 Antigen Test - 20 PACK. 2022. <https://rapidselftest.com.au/products/covid-19-antigen-test-20-pack> (accessed 05th April, 2022).
32. Jamotte A, Chong CF, Manton A, Macabeo B, Toumi M. Impact of quadrivalent influenza vaccine on public health and influenza-related costs in Australia. *BMC Public Health* 2016; **16**: 630.
33. Newall AT, Wood JG, Oudin N, MacIntyre CR. Cost-effectiveness of pharmaceutical-based pandemic influenza mitigation strategies. *Emerg Infect Dis* 2010; **16**(2): 224-30.
34. Rechner IJ, Lipman J. The costs of caring for patients in a tertiary referral Australian Intensive Care Unit. *Anaesth Intensive Care* 2005; **33**(4): 477-82.
35. COVID-19 Australia: Epidemiology Report 57: Reporting period ending 16th January 2022. *Commun Dis Intell* (2018) 2022; **46**.
36. Neilan AM, Losina E, Bangs AC, et al. Clinical Impact, Costs, and Cost-Effectiveness of Expanded SARS-CoV-2 Testing in Massachusetts. *Clin Infect Dis* 2020.
37. Baggett TP, Scott JA, Le MH, et al. Clinical Outcomes, Costs, and Cost-effectiveness of Strategies for Adults Experiencing Sheltered Homelessness During the COVID-19 Pandemic. *JAMA Netw Open* 2020; **3**(12): e2028195.
38. Global, regional, and national incidence, prevalence, and years lived with disability for 354 diseases and injuries for 195 countries and territories, 1990-2017: a systematic analysis for the Global Burden of Disease Study 2017. *Lancet* 2018; **392**(10159): 1789-858.
39. Cleary SM, Wilkinson T, Tamandjou Tchuem CR, Docrat S, Solanki GC. Cost-effectiveness of intensive care for hospitalised COVID-19 patients: experience from South Africa. *BMC Health Serv Res* 2021; **21**(1): 82.
40. Kohli M, Maschio M, Becker D, Weinstein MC. The potential public health and economic value of a hypothetical COVID-19 vaccine in the United States: Use of cost-effectiveness modeling to inform vaccination prioritisation. *Vaccine* 2021; **39**(7): 1157-64.
41. Vaezi A, Meysamie A. COVID-19 Vaccines Cost-Effectiveness Analysis: A Scenario for Iran. *Vaccines (Basel)* 2021; **10**(1).
42. Li R, Liu H, Fairley CK, et al. Cost-effectiveness analysis of BNT162b2 COVID-19 booster vaccination in the United States. *International Journal of Infectious Diseases* 2022.

43. MHE. The Price Tags on the COVID-19 Vaccines. 2021. <https://www.managedhealthcareexecutive.com/view/the-price-tags-on-the-covid-19-vaccines> (accessed 05th April, 2022).
44. Couzin-Frankel J. Antiviral pills could change pandemic's course. *Science* 2021; **374**(6569): 799-800.
45. Mahase E. Covid-19: Pfizer's paxlovid is 89% effective in patients at risk of serious illness, company reports. *Bmj* 2021; **375**: n2713.
46. Wen W, Chen C, Tang J, et al. efficacy and safety of three new oral antiviral treatment (molnupiravir, fluvoxamine and Paxlovid) for COVID-19: a meta-analysis. *Ann Med* 2022; **54**(1): 516-23.
47. Usher AD. The global COVID-19 treatment divide. *Lancet* 2022; **399**(10327): 779-82.
48. Ledford H, Maxmen A. African clinical trial denied access to key COVID drug Paxlovid. *Nature* 2022.
49. Pulliam JRC, van Schalkwyk C, Govender N, et al. Increased risk of SARS-CoV-2 reinfection associated with emergence of Omicron in South Africa. *Science* 2022: eabn4947.
50. Scheepers C, Everatt J, Amoako DG, et al. emergence and phenotypic characterisation of the global SARS-CoV-2 C.1.2 lineage. *Nat Commun* 2022; **13**(1): 1976.
51. DeGrace MM, Ghedin E, Frieman MB, et al. Defining the risk of SARS-CoV-2 variants on immune protection. *Nature* 2022.
52. WHO. Recommendations announced for influenza vaccine composition for the 2022-2023 northern hemisphere influenza season. 2022. <https://www.who.int/news/item/25-02-2022-recommendations-announced-for-influenza-vaccine-composition-for-the-2022-2023-northern-hemisphere-influenza-season> April 05, 2022).

**Table 1.** The results of the cost-effectiveness analysis of COVID-19 booster vaccination in Australia over an evaluation period of 180 days.

|                                      | Counterfactual scenario with no booster strategy | Current booster strategy | Universal booster strategy | Incremental benefits of booster strategy* | Incremental benefits of universal booster strategy* |
|--------------------------------------|--------------------------------------------------|--------------------------|----------------------------|-------------------------------------------|-----------------------------------------------------|
| QALY                                 | 10,082,957                                       | 10,083,628               | 10,084,557                 | 670                                       | 1599                                                |
| Costs (A\$, million)                 | 5,311.5                                          | 4,841.3                  | 3,928.8                    | -395.2                                    | -1,382.7                                            |
| Booster vaccination cost             | 0                                                | 883.0                    | 1,454.3                    | 883.0                                     | 1,454.3                                             |
| Direct medical cost                  | 5,311.5                                          | 4,033.3                  | 2,474.5                    | -1,278.2                                  | -2,837.0                                            |
| Death cases                          | 5,656                                            | 4,308                    | 2,602                      | 1,348                                     | 3,054                                               |
| ICER                                 | --                                               | --                       | --                         | Cost-saving                               | Cost-saving                                         |
| Benefit-cost ratio                   | --                                               | --                       | --                         | 1.45                                      | 1.95                                                |
| Cost/death prevented, A\$            | --                                               | --                       | --                         | 655,077                                   | 476,123                                             |
| Net monetary benefit, (A\$, million) | --                                               | --                       | --                         | 428.7                                     | 1,462.7                                             |

\* Incremental benefits = difference in QALY while comparing to the no booster strategy.

Benefit-cost ratio: the ratio between the reduction in the direct medical cost for COVID-19 and the investment in booster vaccination for individuals aged  $\geq 16$  in Australia.

Net monetary benefit (NMB) is calculated as (incremental benefit  $\times$  willingness-to-pay threshold) – incremental cost.

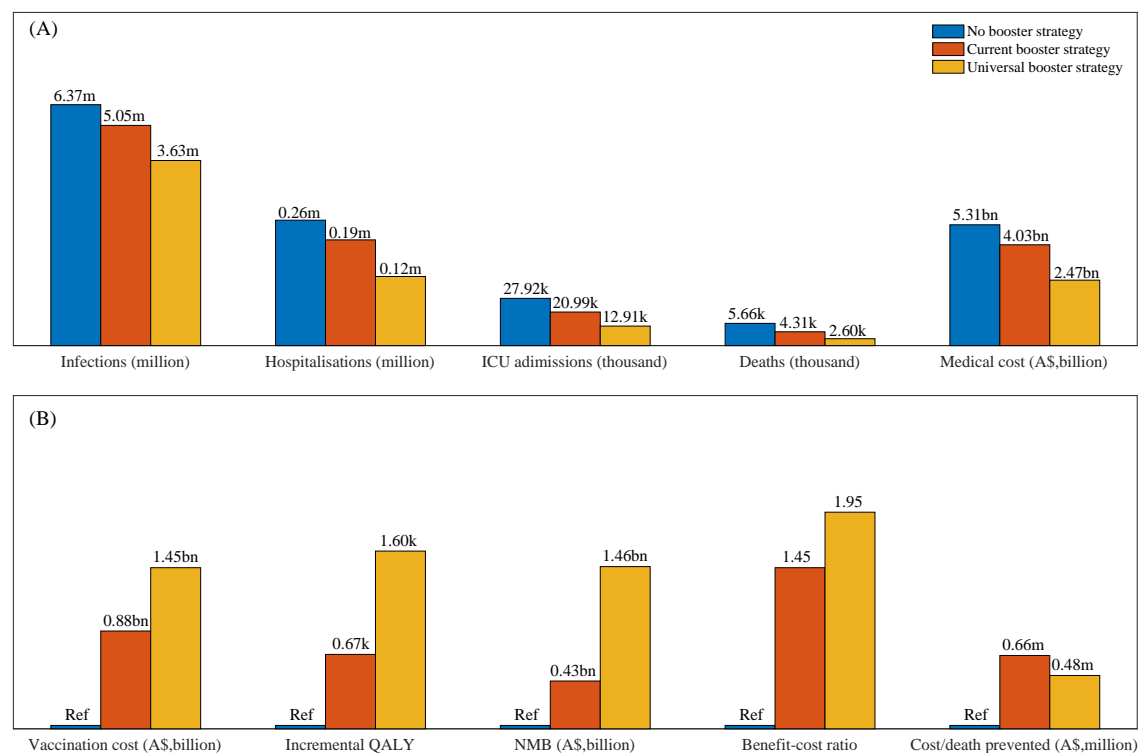

**Figure 1** Comparison of population impacts and cost-effectiveness of the three booster vaccination scenarios for the Omicron epidemic in Australia. (No booster strategy: counterfactual scenario assumed there was no booster vaccination implemented in Australia after the 2<sup>nd</sup> dose; Current booster strategy: current scenario represented the actual situation of booster vaccination in Australia; Universal booster strategy: universal scenario means all eligible individuals received a booster immediately once their booster vaccination requirement is met).

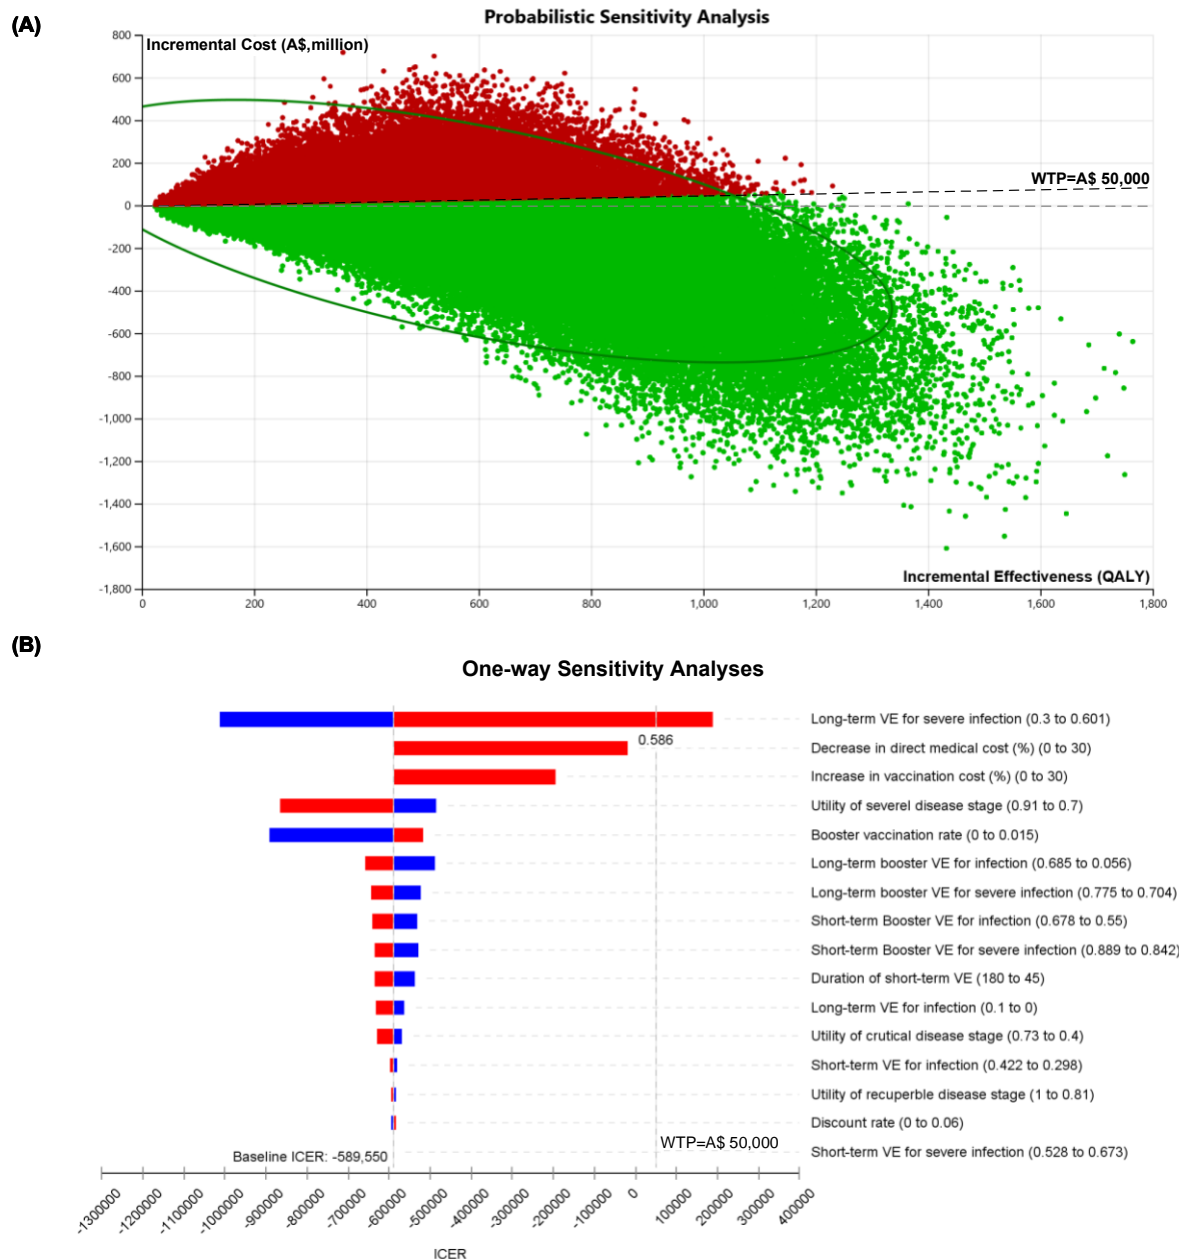

**Figure 2** The cost-effectiveness analysis of COVID-19 booster vaccination strategy in Australia. (A) the result of probabilistic sensitivity analysis based on 100,000 simulations (71.2% chance of being cost-effective, including 66.7% chance of being cost-saving); (B) tornado plot of one-way sensitivity analyses. A horizontal bar was generated for each parameter analysis. The width of the bar indicates the potential effect of the associated parameter on the ICER when the parameter is changed within its range. The red part of each bar indicates high values of input parameter ranges, while the blue part indicates low values. The dotted vertical line represents the threshold of willingness-to-pay (WTP) of the baseline.



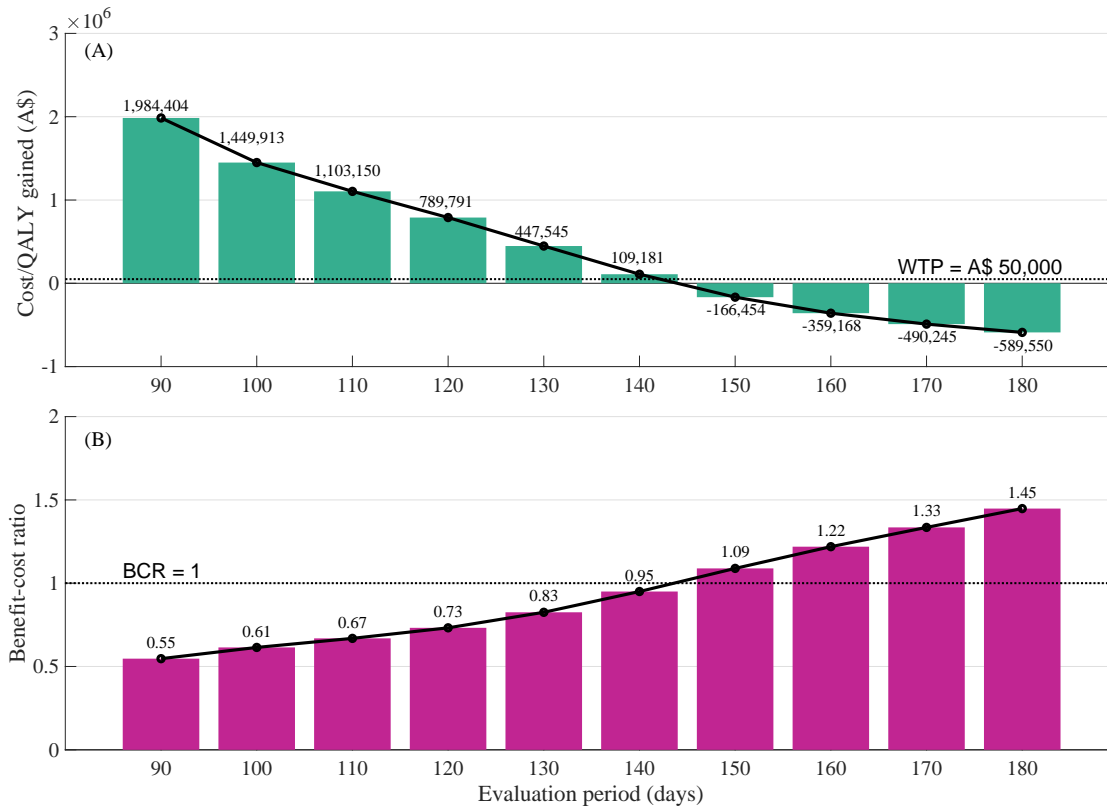

**Figure 3** The effects of evaluation periods on the cost-effectiveness of the current booster strategy compared with the counterfactual 'no booster strategy'. (A) Cost/QALY gained: incremental cost-effectiveness ratio; (B) Benefit-cost ratio, BCR.
