1           **mRNA-based COVID-19 booster vaccination is highly effective and cost-effective in Australia**

2  
3  
4   Rui Li<sup>1</sup>, Hanting Liu<sup>1</sup>, Christopher K Fairley<sup>1,2,3</sup>, Jason J Ong<sup>1,2,3</sup>, Yuming Guo<sup>1,2,3</sup>, Zhuoru Zou<sup>1</sup>, Li Xie<sup>1</sup>,  
5   Guihua Zhuang<sup>1,5</sup>, Yan Li<sup>6,7\*</sup>, Mingwang Shen<sup>1,5\*</sup>, Lei Zhang<sup>1,2,3,4\*</sup>

- 6  
7   1. China-Australia Joint Research Center for Infectious Diseases, School of Public Health, Xi'an Jiaotong  
8   University Health Science Center, Xi'an, Shaanxi, 710061, China  
9   2. Melbourne Sexual Health Centre, Alfred Health, Melbourne, Australia  
10   3. Central Clinical School, Faculty of Medicine, Nursing and Health Sciences, Monash University, Melbourne,  
11   VIC, Australia  
12   4. Department of Epidemiology and Biostatistics, College of Public Health, Zhengzhou University, Zhengzhou  
13   450001, Henan, China.  
14   5. Key Laboratory for Disease Prevention and Control and Health Promotion of Shaanxi Province, Xi'an,  
15   Shaanxi, 710061, China  
16   6. Department of Population Health Science and Policy, Icahn School of Medicine at Mount Sinai, New York,  
17   NY, USA  
18   7. Department of Obstetrics, Gynaecology, and Reproductive Science, Icahn School of Medicine at Mount  
19   Sinai, New York, NY, USA

20  
21   **\*Corresponding authors:**

- 22   • Lei Zhang, PhD, China-Australia Joint Research Center for Infectious Diseases, School of Public  
23   Health, Xi'an Jiaotong University Health Science Center, Xi'an, Shaanxi, China.  
24   Email: [lei.zhang1@monash.edu](mailto:lei.zhang1@monash.edu)  
25   • Mingwang Shen, PhD, China-Australia Joint Research Center for Infectious Diseases, School of  
26   Public Health, Xi'an Jiaotong University Health Science Center, Xi'an, Shaanxi, China. Email:  
27   [mingwangshen521@xjtu.edu.cn](mailto:mingwangshen521@xjtu.edu.cn)  
28   • Yan Li, PhD, Department of Population Health Science and Policy, Icahn School of Medicine at  
29   Mount Sinai, New York, NY, USA  
30   Email: [yan.li1@mountsinai.org](mailto:yan.li1@mountsinai.org)

31  
32   **Word Count.** Main text: 2863 words; Abstract: 234 words.  
33

34 **Abstract**

35

36 **Background:** Australia implemented an mRNA-based booster vaccination strategy against the COVID-19  
37 Omicron variant in November 2021. We aimed to evaluate the effectiveness and cost-effectiveness of the booster  
38 strategy over 180 days.

39

40 **Methods:** We developed a decision-analytic Markov model of COVID-19 to evaluate the cost-effectiveness of  
41 a booster strategy (administered 3 months after 2<sup>nd</sup> dose) in those aged  $\geq 16$  years in Australia from a healthcare  
42 system perspective. The willingness-to-pay threshold was chosen as A\$ 50,000.

43

44 **Findings:** Compared with 2-doses of COVID-19 vaccines without a booster, Australia's booster strategy would  
45 incur an additional cost of A\$0.88 billion but save A\$1.28 billion in direct medical cost and gain 670 quality-  
46 adjusted life years (QALYs) in 180 days of its implementation. This suggested the booster strategy is cost-saving,  
47 corresponding to a benefit-cost ratio of 1.45 and a net monetary benefit of A\$0.43 billion. The strategy would  
48 prevent 1.32 million new infections, 65,170 hospitalisations, 6,927 ICU admissions and 1,348 deaths from  
49 COVID-19 in 180 days. Further, a universal booster strategy of having all individuals vaccinated with the booster  
50 shot immediately once their eligibility is met would have resulted in a gain of 1,599 QALYs, a net monetary  
51 benefit of A\$1.46 billion and a benefit-cost ratio of 1.95 in 180 days.

52

53 **Interpretation:** The COVID-19 booster strategy implemented in Australia is likely to be effective and cost-  
54 effective for the Omicron epidemic. Universal booster vaccination would have further improved its effectiveness  
55 and cost-effectiveness.

56

57 **Funding:** National Natural Science Foundation of China. Bill and Melinda Gates Foundation

58

## 59 Introduction

60  
61 As of 5<sup>th</sup> May 2022, the COVID-19 pandemic has caused more than 516 million cases and claimed more than 6  
62 million lives worldwide<sup>1</sup>. Prevention and control of the disease have substantially interrupted economic activities  
63 and caused an enormous economic burden in both developing and developed countries<sup>2-4</sup>. Australia implemented  
64 a strict 'COVID-zero' policy and reported 200,000 cumulative infections and less than 2000 deaths (case-fatality  
65 rate ~1%) over the past two years before the recent emergence of the Omicron variant<sup>5</sup>. However, the Omicron  
66 outbreak alone has caused more than 6 million new COVID-19 cases in six months since November 2021,  
67 despite more than 90% full (2-doses) vaccination coverage in Australia<sup>6</sup>. Given the lower viral pathogenicity of  
68 Omicron and high vaccination protection against disease progression, about 5000 deaths (case-fatality rate  
69 ~0.08%) were reported for Omicron, demonstrating a much lower mortality rate compared with the previous  
70 variants.

71  
72 A COVID-19 booster reportedly improves vaccine protection in fully vaccinated individuals against the Delta  
73 variant<sup>7-10</sup>. Since the emergence of the Omicron variant, it has become apparent that the waning of vaccine  
74 protection of two doses of COVID-19 vaccine accelerated, likely due to Omicron's ability to evade both natural  
75 and vaccine-induced immunity<sup>11,12</sup>. Australian Technical Advisory Group on Immunisation (ATAGI) approved  
76 the use of a booster first for individuals at greater risk of severe COVID-19 (e.g. immunocompromised  
77 individuals) at the end of October 2021 and gradually expanded to cover all individuals aged  $\geq 16$  years during  
78 the Omicron epidemic. ATAGI mainly recommends mRNA vaccines (Pfizer/BNT162b2, Moderna/mRNA1273)  
79 as a single booster dose over AstraZeneca for all eligible Australian residents, including those who have received  
80 the AstraZeneca COVID-19 vaccine for their primary course<sup>13</sup>. Among individuals who are fully vaccinated in  
81 Australia, about 35% were fully vaccinated with AstraZeneca and 65% with mRNA vaccines. For booster shots,  
82 mRNA vaccines have become the dominant booster option (>99%)<sup>6</sup>, although other vaccines also exist.

83  
84 Accumulating evidence suggests that the disease severity associated with the Omicron variant is far lower than  
85 that of the Delta variant<sup>14,15</sup>, potentially contributing to much lower disease and economic burden. Most  
86 infections are asymptomatic or with very mild symptoms and often spontaneously recover within seven days,  
87 especially among fully vaccinated individuals<sup>16,17</sup>. An increasing number of experts argue for treating Omicron  
88 as a mild infectious disease like seasonal influenza in both surveillance and treatment<sup>18,19</sup>. Namely, non-  
89 pharmaceutical interventions (NPIs) for COVID-19 in Australia, similar to many other countries worldwide,  
90 would be minimal. As a result, vaccination becomes the major means to reduce COVID-19 transmission at a  
91 population level<sup>5</sup>. Therefore, evaluating the potential population impact and cost-effectiveness of the widely  
92 administered booster shots in Australia would shed important light on Australia's COVID-19 prevention and  
93 control strategy. Our study aimed to evaluate the population impact and cost-effectiveness of Australia's COVID-  
94 19 booster strategy during the Omicron epidemic using a decision-analytic Markov model.

## 96 Methods

### 98 Study design

99 Based on a decision-analytic Markov model, we conducted an economic evaluation on the cost-effectiveness of  
100 COVID-19 booster vaccination (predominately mRNA vaccines, 3 months after 2<sup>nd</sup> dose) in those aged  $\geq 16$   
101 years in Australia. The evaluation was conducted from a healthcare system perspective. The model was  
102 constructed using TreeAge Pro 2021 R1.1, and the analysis was conducted according to the Consolidated Health  
103 Economic Evaluation Reporting Standards 2022 (CHEERS 2022) statement<sup>20</sup>.

### 105 Modelling

106 A decision-analytic Markov model was constructed to simulate the disease progression of SARS-CoV-2  
107 infection for those aged  $\geq 16$  years over a period of 180 days. As the Omicron variant of SARS-CoV-2 has  
108 become dominant in Australia, our study mainly focused on modelling the transmission of the Omicron variant.  
109 Existing evidence indicated that the vaccine efficacy (VE) of Pfizer-BioNTech BNT162b2, Moderna  
110 mRNA1273 and AstraZeneca AZD1222 against Omicron would gradually wane after three months<sup>21-23</sup>. Thus,  
111 we defined the vaccine efficacy from 2 weeks to 3 months after the 2<sup>nd</sup> dose as a 'short-term VE', whereas the

112 vaccine efficacy 3 months beyond the 2<sup>nd</sup> dose as a 'long-term VE'. Likewise, the vaccine efficacy after a booster  
113 could also be divided into a 'short-term booster VE' and a 'long-term booster VE' by the threshold of 3 months.

114  
115 The model consisted of 11 health states capturing the disease progression of COVID-19 (Figure S1). A  
116 vaccinated individual may be infected by SARS-CoV-2 and enter a 'latent infection state'. After a mean  
117 incubation period of 5.2 (4.1-7.0) days<sup>24</sup>, about 83% of infected individuals developed symptoms<sup>25</sup>, and the  
118 remaining asymptomatic infections would spontaneously recover. A symptomatic infection might first exhibit  
119 'mild/moderate' symptoms. They might then 'recover' or deteriorate to a 'severe' state. A patient in the 'severe'  
120 state might 'recover' or progress to the 'critical' state. Similarly, a patient in the 'critical' state might 'recover' or  
121 'die'. Transition probabilities between states were estimated using the formula  $p = 1 - e^{-r}$ , where  $r$  denoted  
122 daily transition rate<sup>25</sup>. The basic model cycle length was 1 day, with a half-cycle correction applied.

### 123 124 **Definition of scenarios**

125 We explored three scenarios: Scenario 1: this counterfactual scenario assumed there was no booster vaccination  
126 implemented in Australia after the 2<sup>nd</sup> dose; Scenario 2: current scenario represented the actual situation of  
127 booster vaccination in Australia, achieving coverage of 69.4% by 5<sup>th</sup> May 2022; and Scenario 3: an ideal scenario  
128 of universal booster vaccination where all eligible individuals received a booster immediately once their booster  
129 vaccination requirement is met.

### 130 131 **Data collection**

132 We collected data on the vaccine efficacy (VE) for Omicron variant infection based on an ongoing systematic  
133 review conducted by The International Vaccine Access Center<sup>26</sup>. We included 11 eligible studies to estimate the  
134 pooled short-term and long-term VE of the 2-dose vaccination and booster shot (Appendix 1.2). Based on the  
135 varied VE for preventing COVID-19 infection and severe progression, we developed a mathematical model to  
136 estimate the distributions of clinical disease stages after being infected by SARS-CoV-2 in vaccinated  
137 individuals compared to that in unvaccinated ones (Appendix 1.3). In addition, we collected Australia's daily  
138 reported population incidence from 'Our World in Data', a website hosted and updated daily for COVID-19 cases  
139 worldwide<sup>27</sup>. Integrating with the COVID-19 vaccination information in Australia<sup>6</sup>, we calculated varied  
140 population incidence in varied vaccination statuses during the Omicron epidemic (Appendix 1.4).

141  
142 The costs of booster vaccination included the costs of the mRNA-based vaccine in Australia (A\$53/dose) and  
143 the vaccination administration (\$20/dose)<sup>28,29</sup>. The cost of PCR tests and rapid antigen self-test for COVID-19  
144 infection was estimated to be A\$85 and A\$13 per person, respectively<sup>30,31</sup>. In addition, we collected the costs of  
145 general practitioner (GP) consultation, general hospitalisation and ICU admission from published literature<sup>32-34</sup>.  
146 The cost of medical services varied across clinical disease stages<sup>25,35-37</sup>, and we calculated the total direct medical  
147 cost of COVID-19 cases with varied severity by multiplying the unit cost of the medical services by the duration  
148 of each disease stage (Appendix 1.5). Health utility scores for COVID-19 patients were derived from the disutility  
149 weights of severe lower respiratory tract infection<sup>38,39</sup> and the estimates of pricing models for COVID-19  
150 treatments published by the Institute for Clinical and Economic Review<sup>40</sup> (Appendix 1.6).

151  
152 We assumed a discount rate of 3% (0-6%) annually for both cost and quality-adjusted life-years (QALYs). We  
153 calculated the incremental costs and incremental QALYs for booster vaccination strategy compared with no  
154 booster (counterfactual scenario). The incremental cost-effectiveness ratio (ICER) was defined as the  
155 incremental cost per QALY gained. We used a willingness-to-pay (WTP) threshold of ICER < A\$50,000. We  
156 conducted additional economic evaluations by calculating the benefit-cost ratio, net monetary benefit and  
157 cost/death saved.

### 158 159 **Sensitivity analysis**

160 We conducted a univariate sensitivity analysis to examine the impact of model parameters within their respective  
161 ranges on the ICER to identify the most sensitive parameters and visualised the results using tornado diagrams  
162 (Figure 2). In addition, we conducted a probabilistic sensitivity analysis (PSA) based on 100,000 simulations to  
163 determine the probability of the booster strategy being cost-effective across a range of cost-effectiveness

164 thresholds. The distributions of all model parameters are provided in Appendix 1.7. We also varied the evaluation  
165 period from 90 to 180 days and reported the corresponding ICER and benefit-cost ratio (Figure 3).

## 166 **Results**

### 167 **Population impact and cost-effectiveness of COVID-19 booster strategies in Australia**

#### 168 *Counterfactual scenario with no booster strategy*

169 Figure 1 compared various vaccination scenarios in Australia. In the counterfactual scenario where there was no  
170 booster vaccination in Australia, the Omicron epidemic would result in 6.37 million individuals being infected,  
171 259,200 hospitalisations, 27,917 ICU admissions, and 5,656 deaths over an evaluation period of 180 days. This  
172 will amount to a direct medical cost of A\$5.31 billion.

#### 173 *Current booster strategy*

174 In comparison with the counterfactual scenario, the current booster strategy in Australia would lead to 1.32  
175 million fewer infected cases, 65,170 fewer hospitalisations, 6,927 fewer ICU admissions and 1,348 fewer deaths  
176 in 180 days. At the same time, it would reduce the direct medical cost by A\$1.28 billion but only incur an  
177 additional vaccination cost of A\$0.88 billion, corresponding to a benefit-cost ratio of 1.45. We found that  
178 \$655,077 was required to prevent one COVID-19 death. Moreover, the strategy would gain 670 QALYs during  
179 the 180 days with a net monetary benefit of A\$0.43 billion. This suggested the current booster strategy is cost-  
180 saving.

#### 181 *Universal booster strategy*

182 Compared with the current scenario, a universal booster strategy, where all eligible individuals receive a booster  
183 immediately when their booster vaccination requirement is met, would further improve the benefits. In addition  
184 to the gains in the current booster strategy, this scenario would further reduce 1.42 million infected cases, 73,753  
185 hospitalisations, 8,081 ICU admissions and 1,706 deaths, which amount to A\$1.56 billion less in direct medical  
186 costs. Likewise, the universal booster strategy would gain 1,599 QALYs and a net monetary benefit of A\$1.46  
187 billion during the 180 days with a benefit-cost ratio of 1.95. This scenario would incur an additional vaccination  
188 cost of A\$1.45 billion and cost A\$476,123 to prevent one COVID-19 death.

#### 189 **Impact of individual model parameters on booster cost-effectiveness**

190 The PSA, based on 100,000 simulations, demonstrated the probability of being cost-effective (including being  
191 cost-saving) with the current booster strategy was 71.2%, indicating a high chance of being cost-effective  
192 compared with no booster vaccination (**Figure 2A**). In contrast, the tornado diagram demonstrated that varying  
193 any individual model parameter except long-term VE for severe infection at one time would not change the  
194 conclusion of cost-effectiveness of the booster strategy (**Figure 2B**). We also noted that both the increase in  
195 vaccination cost and decrease in direct medical cost for COVID-19 treatment would reduce the cost-effectiveness  
196 of the booster strategy but were not sufficient to alter our conclusion.

#### 197 **Impact of varied evaluation periods on booster cost-effectiveness**

198 Figure 3 investigated the impact of varying evaluation periods (from 90 to 180 days) on the cost-effectiveness  
199 of the booster strategy compared to no booster. We found that for the current booster strategy to be cost-effective  
200 (ICER < A\$50,000), the evaluation period in this cost-effectiveness analysis needed to be >140 days (**Figure 3A**).  
201 This indicated that the booster strategy would be more cost-effective and beneficial in the long term than in the  
202 short term. Our results showed that the benefit-cost ratio of a booster strategy was 0.55 in a 90-day evaluation  
203 period, which meant that every dollar of investment spent on the booster would only save 0.55 dollars for treating  
204 fewer hospitalised COVID-19 patients. However, this ratio would increase from 0.55 to 1.45 when the evaluation  
205 period was extended to 180 days (**Figure 3B**).

## 206 **Discussion:**

207 Our study evaluated the cost-effectiveness of the mRNA-based booster vaccination strategy among individuals  
208 aged  $\geq 16$  years in Australia. We identified several key findings. First, the current booster vaccination strategy is  
209

217 highly cost-saving. Compared to the no booster scenario, the current booster strategy would prevent 1.32 million  
218 new infections, 65,170 hospitalisations, 6,927 ICU admissions and 1,348 deaths in 180 days. It demonstrates a  
219 cost-benefit ratio of 1.45 and a net monetary benefit of A\$0.43 billion. Further, a universal vaccination strategy  
220 of having all individuals vaccinated with the booster shot immediately once their eligibility is met would be even  
221 more cost-effective compared with the current scenario, further preventing 1.42 million additional new cases,  
222 73,753 hospitalisations, 8,081 ICU admissions and 1,706 deaths. It demonstrates a cost-benefit ratio of 1.95 and  
223 a net monetary benefit of A\$1.46 billion.

224  
225 Our findings of cost-effectiveness are comparable with the findings from similar studies in other settings<sup>41,42</sup>. A  
226 recent cost-effectiveness analysis demonstrates that a BNT162n booster strategy is cost-saving among  
227 individuals aged  $\geq 65$  years in the United States (US)<sup>42</sup>, with a benefit-cost ratio of 1.95. Compared to this 1.95  
228 ratio, our study identifies a lower benefit-cost ratio of 1.45 in Australia, which is mostly attributed to the fact  
229 that vaccine price is twice the cost in the US<sup>28,43</sup>. A higher vaccine price due to export and transport would reduce  
230 the cost-effectiveness of a booster strategy but not enough to alter the conclusion. Further, the significant  
231 development of antiviral drugs for COVID-19 treatment holds promise to change the pandemic's course<sup>44</sup>.  
232 Pfizer's oral antiviral drug Paxlovid is highly effective and reduces by 89% the number of hospital admissions  
233 and deaths among people with COVID-19 who are at high risk of severe illness<sup>45</sup>. Similarly, molnupiravir and  
234 fluvoxamine have also shown high efficacy in preventing severe illness<sup>46</sup>. However, supply shortages and huge  
235 global inequities in access to new treatments for COVID-19, especially in low- and middle-income countries<sup>47,48</sup>,  
236 may be major obstacles to the scale-up of these antiviral treatments worldwide in the short term. In Australia,  
237 the first oral treatments for COVID-19, such as molnupiravir and Paxlovid were provisionally approved by the  
238 Therapeutic Goods Administration (TGA) on 18<sup>th</sup> January 2022. If low-price antiviral drugs can be made  
239 available and accessible to the general population like vaccines in the future, the cost-effectiveness of the booster  
240 strategy will likely reduce substantially.

241  
242 Our study demonstrates a universal booster strategy would have further improved the strategy's cost-  
243 effectiveness. This finding strongly suggests that rapid scale-up of vaccination would be the most beneficial  
244 strategy in combating the Omicron epidemic in Australia. The main reason for the excellent cost-effectiveness  
245 of the universal vaccination strategy is that the vaccine effectiveness (VE) of 2-doses against the Omicron variant  
246 is low, and it declines sharply over time<sup>21-23</sup>. Based on our meta-analysis (Appendix 1.2), the short-term VE  
247 against Omicron infections of 2 doses is 36% and would reduce to only 4% after a period of 90 days. In contrast,  
248 the short-term VE against Omicron infections of a booster shot is 62% and would reduce to 46% after 90 days.  
249 Hence, for the Omicron epidemic with an increased incidence of reinfections and breakthrough infections<sup>49</sup>,  
250 receiving a booster as early as possible may be the most cost-effective way to reduce the COVID-19 disease  
251 burden.

252  
253 Our study suggests the vaccination booster strategy is practical for COVID-19 prevention and control in  
254 Australia. To date, Australia has fully opened its borders, removing most social-distancing restrictions (such as  
255 city lockdown) and the requirement of facial masks in most public areas, including indoors. Contact tracing and  
256 the quarantine requirements for close contacts have also been lifted in Australia. Living with the virus has  
257 become a socially accepted norm in the post-COVID era. Accumulating evidence indicates that the epidemic  
258 will become endemic. Our study suggests that the epidemic needs to be persisting for at least 140 days for the  
259 booster strategy to be cost-effective. This implies the booster strategy will not be compatible with the previous  
260 'COVID-zero' strategy, which often reduced the epidemic to a low level within weeks through harsh NPIs but is  
261 more aligned with an endemic COVID-19 control in Australia. Also, considering the rapid emergence of new  
262 SARS-COV-2 mutants<sup>50,51</sup>, enhancing the vaccine protection in the population remains the most practical way  
263 to avoid a sudden surge of the disease burden of COVID-19 and potential overload of the healthcare system in  
264 Australia. Further, learning from the experiences of seasonal influenza control<sup>52</sup> and regular improvement of  
265 COVID-19 vaccines may also be a necessary strategy in the long term.

266  
267 Our study has several limitations. First, in the absence of empirical evidence of randomised controlled trials, we  
268 estimated the efficacy of the mRNA-based booster against the Omicron variant based on a synthesis of evidence  
269 from real-world data. We conducted various sensitivity analyses to account for the uncertainty in parameter

270 estimation based on real-world data. Second, we assumed that the efficacy of COVID-19 vaccines begins to  
271 wane in 3 months. In reality, the efficacy of vaccines is more likely to gradually decline without a clear cut-off.  
272 This assumption may have led to an overestimate of vaccine efficacy in the short term, and an underestimate in  
273 the long term. Third, we did not consider the other non-mRNA-based COVID-19 vaccines (e.g., AstraZeneca or  
274 Novavax) in Australia. However, AstraZeneca is no longer recommended for use as the booster dose for people  
275 who received a primary vaccination course of the AstraZeneca COVID-19 vaccine, and Novavax is rarely used  
276 (<1%) in Australia. Finally, given limited public health resources and escalating health inequity during the  
277 pandemic, there is a need for more targeted, local-based vaccine and booster distribution strategies that can  
278 achieve a tradeoff between cost-effectiveness and equity. The design of such strategies, while beyond the scope  
279 of this work, will be critical in alleviating the burden of COVID-19, reducing health care costs, and achieving  
280 equity.

281  
282 In conclusion, Australia's current COVID-19 booster strategy is likely to be effective and cost-effective for  
283 curbing this Omicron epidemic. Further, achieving a universal booster vaccination would have improved its  
284 effectiveness and cost-effectiveness.

285  
286

287 **Declarations**

288

289 Ethics approval and consent to participate

290 Not applicable

291

292 Competing interests

293 The authors declare that they have no competing interests.

294

295 Funding

296 The work is supported by the Bill & Melinda Gates Foundation. LZ is supported by the National Natural Science

297 Foundation of China (Grant number: 81950410639); Outstanding Young Scholars Funding (Grant number:

298 3111500001); Xi'an Jiaotong University Basic Research and Profession Grant (Grant number: xtr022019003

299 and xzy032020032) and Xi'an Jiaotong University Young Talent Support Grant (Grant number: YX6J004). MS

300 was supported by the National Natural Science Foundation of China (Grant number: 12171387, 11801435),

301 China Postdoctoral Science Foundation (Grant number: 2018M631134, 2020T130095ZX); Young Talent

302 Support Program of Shaanxi University Association for Science and Technology (Grant number: 20210307).

303

304 Authors' contributions

305 LZ conceived the study. LZ, YL, MS and RL designed and constructed the model. RL performed the modelled

306 analyses, graphed and interpreted the results. RL, HL, ZZ, and LX contributed to the collection of data and model

307 parameters. RL drafted the manuscript. LZ, MS, YL, CKF, JJO and YG critically revised the manuscript. All

308 authors reviewed the manuscript and approved the final version.

309



310 **Reference:**

- 311
- 312 1. JHU. Coronavirus Resource Center: COVID-19 Tracking. 2022. <https://coronavirus.jhu.edu> (accessed
- 313 April 10, 2022).
- 314 2. Jin H, Wang H, Li X, et al. Economic burden of COVID-19, China, January-March, 2020: a cost-of-
- 315 illness study. *Bull World Health Organ* 2021; **99**(2): 112-24.
- 316 3. Ramgobin D, Benson J, Kalayanamitra R, et al. The Economic Implications of COVID-19 in the United
- 317 States. *S D Med* 2020; **73**(5): 218-22.
- 318 4. McKibbin W, & Fernando, R. The economic impact of COVID-19. *Econ Time* COVID-19.
- 319 2020;45(10.1162).
- 320 5. Australia. About the COVID-19 pandemic. 2021. [https://www.health.gov.au/health-alerts/covid-](https://www.health.gov.au/health-alerts/covid-19/about)
- 321 [19/about](https://www.health.gov.au/health-alerts/covid-19/about) (accessed 05th April, 2022).
- 322 6. Australia. COVID-19 vaccination daily rollout update. 2022.
- 323 <https://www.health.gov.au/resources/collections/covid-19-vaccination-daily-rollout-update> (accessed 05th
- 324 April, 2022).
- 325 7. Andrews N, Tessier E, Stowe J, et al. Vaccine effectiveness and duration of protection of Comirnaty,
- 326 Vaxzevria and Spikevax against mild and severe COVID-19 in the UK. *medRxiv* 2021: 2021.09.15.21263583.
- 327 8. Chemaitelly H, Tang P, Hasan MR, et al. Waning of BNT162b2 Vaccine Protection against SARS-
- 328 CoV-2 Infection in Qatar. *N Engl J Med* 2021.
- 329 9. Goldberg Y, Mandel M, Bar-On YM, et al. Waning Immunity after the BNT162b2 Vaccine in Israel. *N*
- 330 *Engl J Med* 2021.
- 331 10. Tartof SY, Slezak JM, Fischer H, et al. effectiveness of mRNA BNT162b2 COVID-19 vaccine up to 6
- 332 months in a large integrated health system in the USA: a retrospective cohort study. *Lancet* 2021; **398**(10309):
- 333 1407-16.
- 334 11. Andrews N, Stowe J, Kirsebom F, et al. Effectiveness of COVID-19 vaccines against the Omicron
- 335 (B.1.1.529) variant of concern. *medRxiv* 2021: 2021.12.14.21267615.
- 336 12. Dejnirattisai W, Huo J, Zhou D, et al. SARS-CoV-2 Omicron-B.1.1.529 leads to widespread escape
- 337 from neutralising antibody responses. *Cell* 2022; **185**(3): 467-84.e15.
- 338 13. Australia. ATAGI recommendations on the use of a booster dose of COVID-19 vaccine. 2022.
- 339 [https://www.health.gov.au/resources/publications/atagi-recommendations-on-the-use-of-a-booster-dose-of-](https://www.health.gov.au/resources/publications/atagi-recommendations-on-the-use-of-a-booster-dose-of-covid-19-vaccine)
- 340 [covid-19-vaccine](https://www.health.gov.au/resources/publications/atagi-recommendations-on-the-use-of-a-booster-dose-of-covid-19-vaccine) (accessed 05th April, 2022).
- 341 14. Wang L, Berger NA, Kaelber DC, Davis PB, Volkow ND, Xu R. COVID infection rates, clinical
- 342 outcomes, and racial/ethnic and gender disparities before and after Omicron emerged in the US. *medRxiv* 2022.
- 343 15. Madhi SA, Kwatra G, Myers JE, et al. Population Immunity and Covid-19 Severity with Omicron
- 344 Variant in South Africa. *N Engl J Med* 2022.
- 345 16. Ledford H. How severe are Omicron infections? *Nature* 2021; **600**(7890): 577-8.
- 346 17. Madhi SA, Ihekweazu C, Rees H, Pollard AJ. Decoupling of omicron variant infections and severe
- 347 COVID-19. *Lancet* 2022; **399**(10329): 1047-8.
- 348 18. Adam D. Will Omicron end the pandemic? Here's what experts say. *Nature* 2022; **602**(7895): 20-1.
- 349 19. Mattiuzzi C, Henry BM, Lippi G. COVID-19 vaccination and SARS-CoV-2 Omicron (B.1.1.529)
- 350 variant: a light at the end of the tunnel? *Int J Infect Dis* 2022; **118**: 167-8.
- 351 20. Husereau D, Drummond M, Augustovski F, et al. Consolidated Health Economic Evaluation Reporting
- 352 Standards 2022 (CHEERS 2022) Statement: Updated Reporting Guidance for Health Economic Evaluations.
- 353 *Value Health* 2022; **25**(1): 3-9.
- 354 21. Ferdinands JM, Rao S, Dixon BE, et al. Waning 2-Dose and 3-Dose Effectiveness of mRNA Vaccines
- 355 Against COVID-19-Associated Emergency Department and Urgent Care Encounters and Hospitalisations
- 356 Among Adults During Periods of Delta and Omicron Variant Predominance - VISION Network, 10 States,
- 357 August 2021-January 2022. *MMWR Morb Mortal Wkly Rep* 2022; **71**(7): 255-63.
- 358 22. Brian J. Willett JG, Oscar A. MacLean, Craig Wilkie, Nicola Logan, Giuditta De Lorenzo, Wilhelm
- 359 Furnon, Sam Scott, Maria Manali, Agnieszka Szemiel, Shirin Ashraf, Elen Vink, William T. Harvey, Chris Davis,
- 360 Richard Orton, et al. The hyper-transmissible SARS-CoV-2 Omicron variant exhibits significant antigenic
- 361 change, vaccine escape and a switch in cell entry mechanism. 2022.

- 362 23. Hiam Chemaitelly HHA, Sawsan AlMukdad, Patrick Tang, Mohammad R. Hasan, Hadi M. Yassine,  
363 Hebah A. Al Khatib, Maria K. Smatti, Peter Coyle, Zaina Al Kanaani, Einas Al Kuwari, Andrew Jeremijenko,  
364 Anvar Hassan Kaleeckal, Ali Nizar Latif, Riyazuddin Mohammad Shaik, Hanan F. Abdul Rahim, Gheyath K.  
365 Nasrallah, Mohamed Ghaith Al Kuwari, Adeel A. Butt, Hamad Eid Al Romaihi, Mohamed H. Al-Thani,  
366 Abdullatif Al Khal, Roberto Bertollini, Laith J. Abu-Raddad. Duration of protection of BNT162b2 and mRNA-  
367 1273 COVID-19 vaccines against symptomatic SARS-CoV-2 Omicron infection in Qatar. 2022.
- 368 24. Li Q, Guan X, Wu P, et al. Early Transmission Dynamics in Wuhan, China, of Novel Coronavirus-  
369 Infected Pneumonia. *N Engl J Med* 2020; **382**(13): 1199-207.
- 370 25. Reddy KP, Shebl FM, Foote JHA, et al. Cost-effectiveness of public health strategies for COVID-19  
371 epidemic control in South Africa: a microsimulation modelling study. *Lancet Glob Health* 2021; **9**(2): e120-e9.
- 372 26. IVAC. Results of COVID-19 Vaccine Effectiveness Studies: An Ongoing Systematic Review. 2022.  
373 <https://view-hub.org/resources> (accessed 05th March, 2022).
- 374 27. OWID. COVID vaccination data. 2022. <https://ourworldindata.org/covid-vaccinations> (accessed 05th  
375 April, 2022).
- 376 28. Dean L. How much the Covid-19 vaccine will cost Australians. 2020.  
377 <https://au.finance.yahoo.com/news/how-much-the-covid-19-vaccine-will-cost-australians-011135657.html>  
378 (accessed 05th April, 2022).
- 379 29. Rasdien P. Pharmacies and GPs are charging people for their free influenza vaccination. 2019.  
380 [https://thewest.com.au/news/health/pharmacies-and-gps-are-charging-people-for-their-free-influenza-](https://thewest.com.au/news/health/pharmacies-and-gps-are-charging-people-for-their-free-influenza-vaccination-ng-b881206397z)  
381 [vaccination-ng-b881206397z](https://thewest.com.au/news/health/pharmacies-and-gps-are-charging-people-for-their-free-influenza-vaccination-ng-b881206397z) (accessed 05th April, 2022).
- 382 30. MBS. Extension of SARS-CoV-2 (COVID-19) Laboratory Testing Items. 2022.  
383 <http://www.mbsonline.gov.au/internet/mbsonline/publishing.nsf/Content/Factsheet-Cov.LTI> (accessed 27th  
384 February, 2022).
- 385 31. Test RS. Covid-19 Antigen Test - 20 PACK. 2022. [https://rapidselftest.com.au/products/covid-19-](https://rapidselftest.com.au/products/covid-19-antigen-test-20-pack)  
386 [antigen-test-20-pack](https://rapidselftest.com.au/products/covid-19-antigen-test-20-pack) (accessed 05th April, 2022).
- 387 32. Jamotte A, Chong CF, Manton A, Macabeo B, Toumi M. Impact of quadrivalent influenza vaccine on  
388 public health and influenza-related costs in Australia. *BMC Public Health* 2016; **16**: 630.
- 389 33. Newall AT, Wood JG, Oudin N, MacIntyre CR. Cost-effectiveness of pharmaceutical-based pandemic  
390 influenza mitigation strategies. *Emerg Infect Dis* 2010; **16**(2): 224-30.
- 391 34. Rechner IJ, Lipman J. The costs of caring for patients in a tertiary referral Australian Intensive Care  
392 Unit. *Anaesth Intensive Care* 2005; **33**(4): 477-82.
- 393 35. COVID-19 Australia: Epidemiology Report 57: Reporting period ending 16th January 2022. *Commun*  
394 *Dis Intell* (2018) 2022; **46**.
- 395 36. Neilan AM, Losina E, Bangs AC, et al. Clinical Impact, Costs, and Cost-Effectiveness of Expanded  
396 SARS-CoV-2 Testing in Massachusetts. *Clin Infect Dis* 2020.
- 397 37. Baggett TP, Scott JA, Le MH, et al. Clinical Outcomes, Costs, and Cost-effectiveness of Strategies for  
398 Adults Experiencing Sheltered Homelessness During the COVID-19 Pandemic. *JAMA Netw Open* 2020; **3**(12):  
399 e2028195.
- 400 38. Global, regional, and national incidence, prevalence, and years lived with disability for 354 diseases  
401 and injuries for 195 countries and territories, 1990-2017: a systematic analysis for the Global Burden of Disease  
402 Study 2017. *Lancet* 2018; **392**(10159): 1789-858.
- 403 39. Cleary SM, Wilkinson T, Tamandjou Tchuem CR, Docrat S, Solanki GC. Cost-effectiveness of  
404 intensive care for hospitalised COVID-19 patients: experience from South Africa. *BMC Health Serv Res* 2021;  
405 **21**(1): 82.
- 406 40. Kohli M, Maschio M, Becker D, Weinstein MC. The potential public health and economic value of a  
407 hypothetical COVID-19 vaccine in the United States: Use of cost-effectiveness modeling to inform vaccination  
408 prioritisation. *Vaccine* 2021; **39**(7): 1157-64.
- 409 41. Vaezi A, Meysamie A. COVID-19 Vaccines Cost-Effectiveness Analysis: A Scenario for Iran. *Vaccines*  
410 (*Basel*) 2021; **10**(1).
- 411 42. Li R, Liu H, Fairley CK, et al. Cost-effectiveness analysis of BNT162b2 COVID-19 booster vaccination  
412 in the United States. *International Journal of Infectious Diseases* 2022.

- 413 43. MHE. The Price Tags on the COVID-19 Vaccines. 2021.  
414 <https://www.managedhealthcareexecutive.com/view/the-price-tags-on-the-covid-19-vaccines> (accessed 05th  
415 April, 2022).
- 416 44. Couzin-Frankel J. Antiviral pills could change pandemic's course. *Science* 2021; **374**(6569): 799-800.
- 417 45. Mahase E. Covid-19: Pfizer's paxlovid is 89% effective in patients at risk of serious illness, company  
418 reports. *Bmj* 2021; **375**: n2713.
- 419 46. Wen W, Chen C, Tang J, et al. efficacy and safety of three new oral antiviral treatment (molnupiravir,  
420 fluvoxamine and Paxlovid) for COVID-19: a meta-analysis. *Ann Med* 2022; **54**(1): 516-23.
- 421 47. Usher AD. The global COVID-19 treatment divide. *Lancet* 2022; **399**(10327): 779-82.
- 422 48. Ledford H, Maxmen A. African clinical trial denied access to key COVID drug Paxlovid. *Nature* 2022.
- 423 49. Pulliam JRC, van Schalkwyk C, Govender N, et al. Increased risk of SARS-CoV-2 reinfection  
424 associated with emergence of Omicron in South Africa. *Science* 2022: eabn4947.
- 425 50. Scheepers C, Everatt J, Amoako DG, et al. emergence and phenotypic characterisation of the global  
426 SARS-CoV-2 C.1.2 lineage. *Nat Commun* 2022; **13**(1): 1976.
- 427 51. DeGrace MM, Ghedin E, Frieman MB, et al. Defining the risk of SARS-CoV-2 variants on immune  
428 protection. *Nature* 2022.
- 429 52. WHO. Recommendations announced for influenza vaccine composition for the 2022-2023 northern  
430 hemisphere influenza season. 2022. [https://www.who.int/news/item/25-02-2022-recommendations-announced-](https://www.who.int/news/item/25-02-2022-recommendations-announced-for-influenza-vaccine-composition-for-the-2022-2023-northern-hemisphere-influenza-season)  
431 [for-influenza-vaccine-composition-for-the-2022-2023-northern-hemisphere-influenza-season](https://www.who.int/news/item/25-02-2022-recommendations-announced-for-influenza-vaccine-composition-for-the-2022-2023-northern-hemisphere-influenza-season) April 05, 2022).
- 432
- 433

434  
435  
436

**Table 1.** The results of the cost-effectiveness analysis of COVID-19 booster vaccination in Australia over an evaluation period of 180 days.

|                                      | Counterfactual scenario with no booster strategy | Current booster strategy | Universal booster strategy | Incremental benefits of booster strategy* | Incremental benefits of universal booster strategy* |
|--------------------------------------|--------------------------------------------------|--------------------------|----------------------------|-------------------------------------------|-----------------------------------------------------|
| QALY                                 | 10,082,957                                       | 10,083,628               | 10,084,557                 | 670                                       | 1599                                                |
| Costs (A\$, million)                 | 5,311.5                                          | 4,841.3                  | 3,928.8                    | -395.2                                    | -1,382.7                                            |
| Booster vaccination cost             | 0                                                | 883.0                    | 1,454.3                    | 883.0                                     | 1,454.3                                             |
| Direct medical cost                  | 5,311.5                                          | 4,033.3                  | 2,474.5                    | -1,278.2                                  | -2,837.0                                            |
| Death cases                          | 5,656                                            | 4,308                    | 2,602                      | 1,348                                     | 3,054                                               |
| ICER                                 | --                                               | --                       | --                         | Cost-saving                               | Cost-saving                                         |
| Benefit-cost ratio                   | --                                               | --                       | --                         | 1.45                                      | 1.95                                                |
| Cost/death prevented, A\$            | --                                               | --                       | --                         | 655,077                                   | 476,123                                             |
| Net monetary benefit, (A\$, million) | --                                               | --                       | --                         | 428.7                                     | 1,462.7                                             |

\* Incremental benefits = difference in QALY while comparing to the no booster strategy.

Benefit-cost ratio: the ratio between the reduction in the direct medical cost for COVID-19 and the investment in booster vaccination for individuals aged  $\geq 16$  in Australia.

Net monetary benefit (NMB) is calculated as (incremental benefit  $\times$  willingness-to-pay threshold) – incremental cost.

437  
438  
439

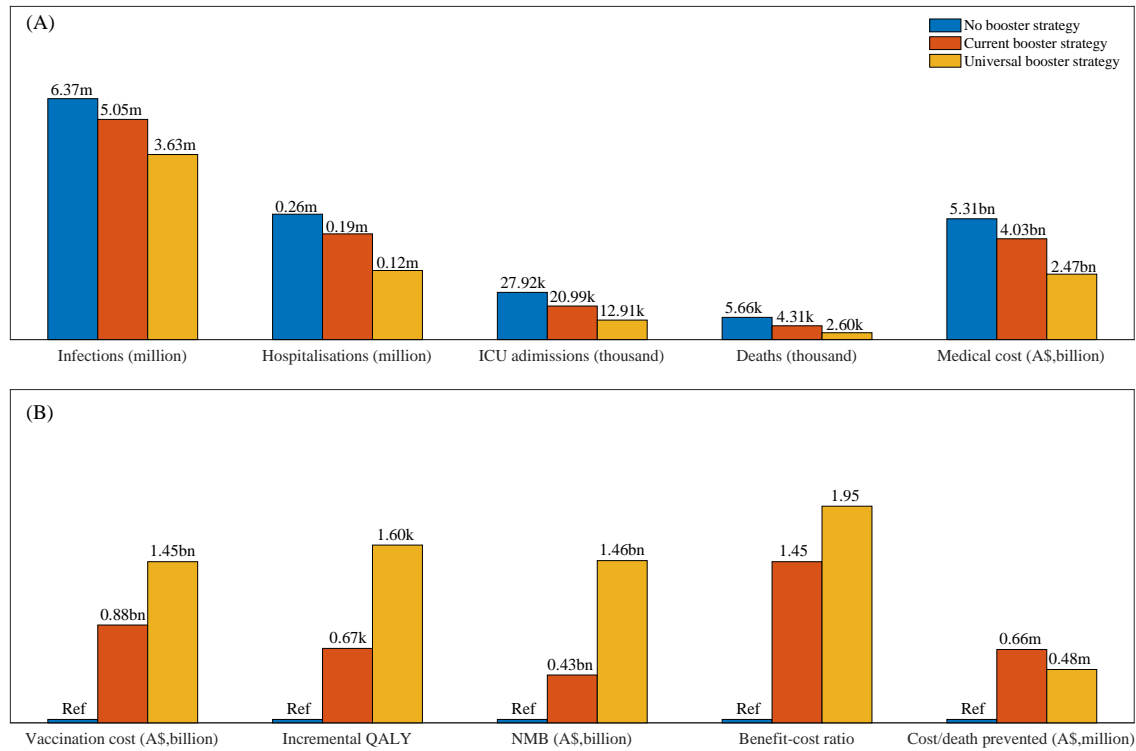

440  
 441 **Figure 1** Comparison of population impacts and cost-effectiveness of the three booster vaccination scenarios for  
 442 the Omicron epidemic in Australia. (No booster strategy: counterfactual scenario assumed there was no booster  
 443 vaccination implemented in Australia after the 2<sup>nd</sup> dose; Current booster strategy: current scenario represented  
 444 the actual situation of booster vaccination in Australia; Universal booster strategy: universal scenario means all  
 445 eligible individuals received a booster immediately once their booster vaccination requirement is met).

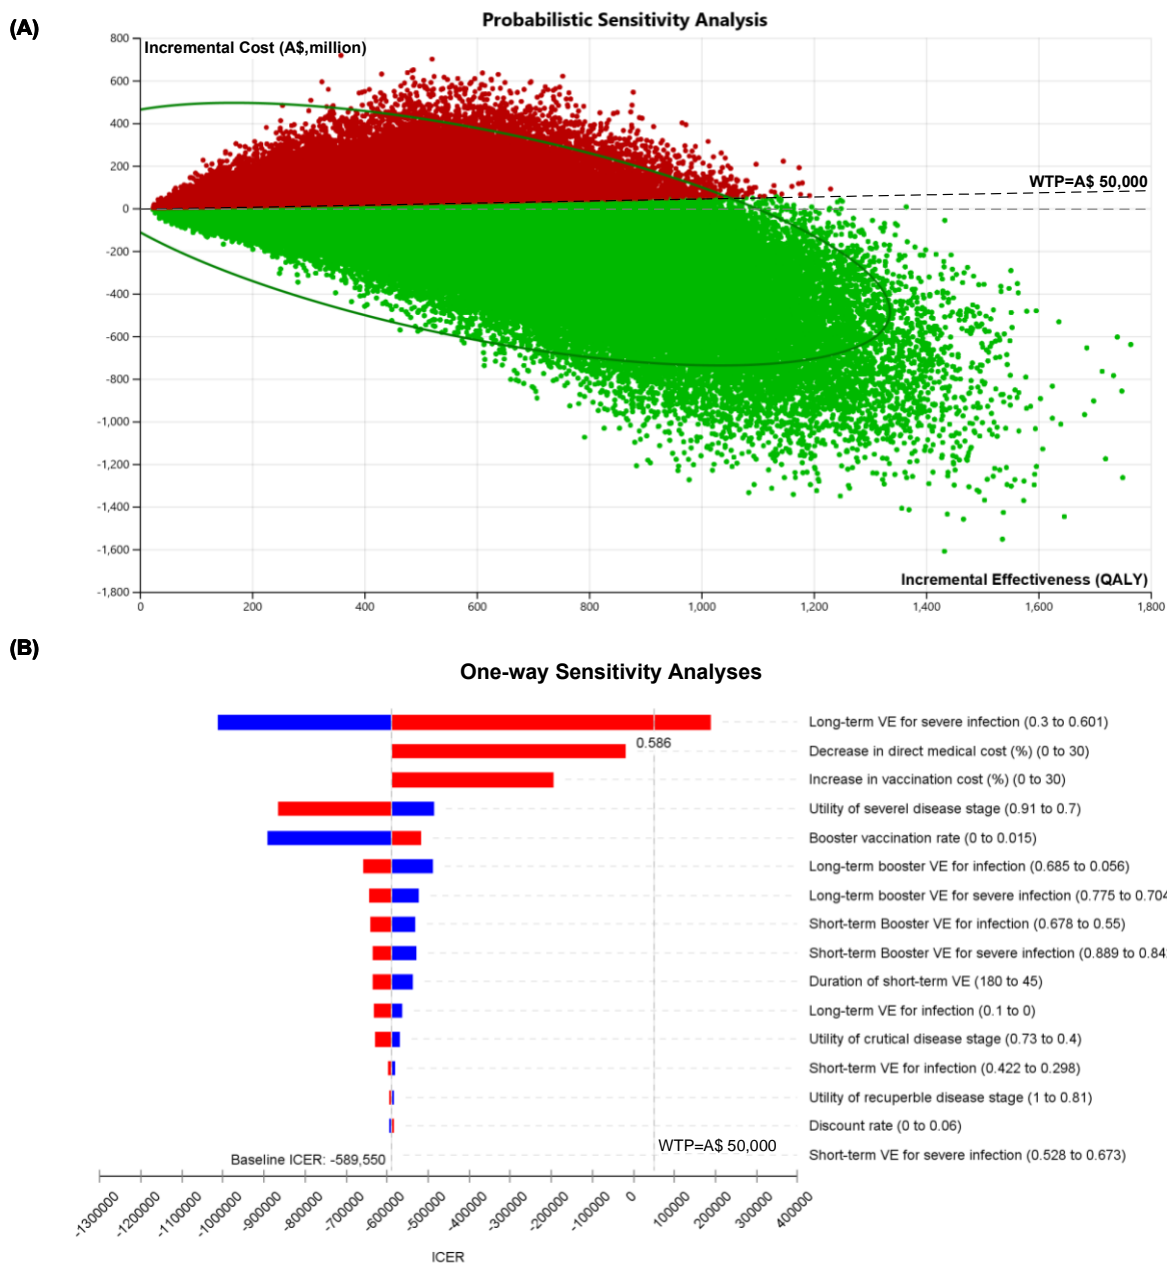

446  
 447 **Figure 2** The cost-effectiveness analysis of COVID-19 booster vaccination strategy in Australia. (A) the result  
 448 of probabilistic sensitivity analysis based on 100,000 simulations (71.2% chance of being cost-effective,  
 449 including 66.7% chance of being cost-saving); (B) tornado plot of one-way sensitivity analyses. A horizontal  
 450 bar was generated for each parameter analysis. The width of the bar indicates the potential effect of the associated  
 451 parameter on the ICER when the parameter is changed within its range. The red part of each bar indicates high  
 452 values of input parameter ranges, while the blue part indicates low values. The dotted vertical line represents the  
 453 threshold of willingness-to-pay (WTP) of the baseline.  
 454

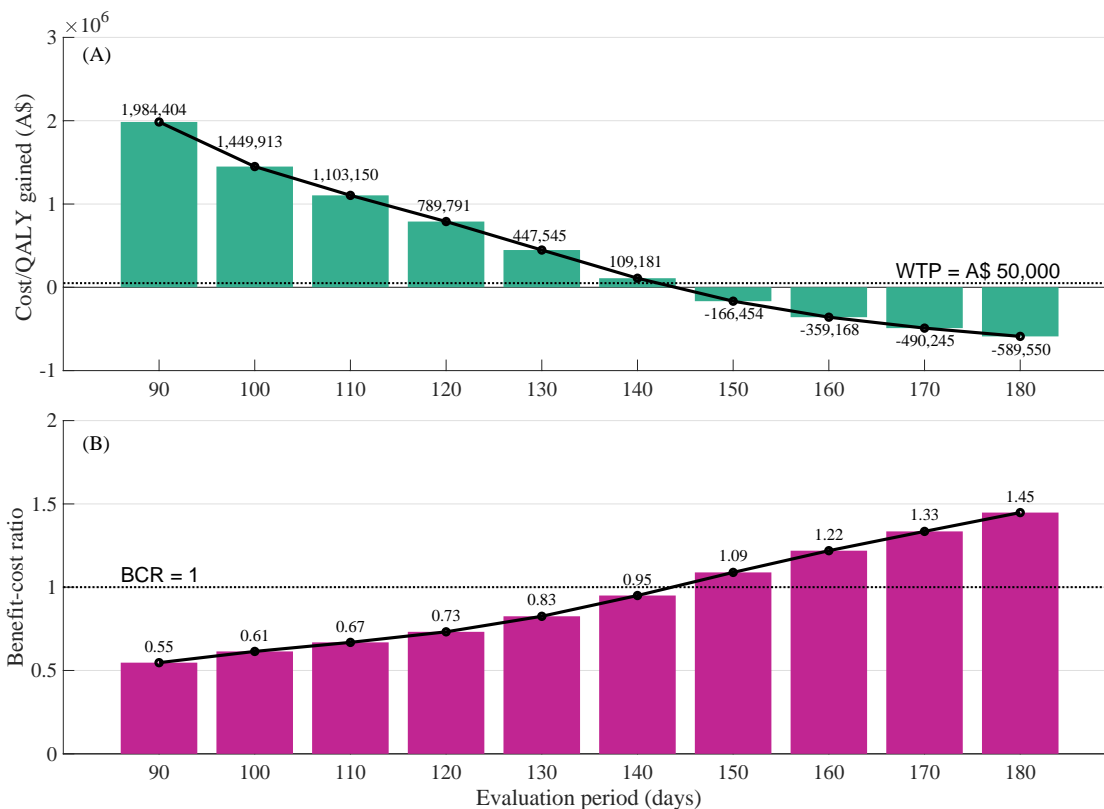

455  
456 **Figure 3** The effects of evaluation periods on the cost-effectiveness of the current booster strategy compared  
457 with the counterfactual 'no booster strategy'. (A) Cost/QALY gained: incremental cost-effectiveness ratio; (B)  
458 Benefit-cost ratio, BCR.
